# Supplementary material
Source: Springer Nature journal article supplement (https://www.springermedizin.de/resource/supplementary/12943_2010_893_MOESM8_ESM.pdf/9551926)

**A**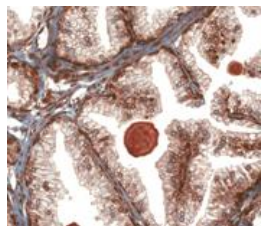**BPH**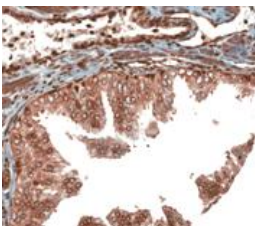**PIN-H**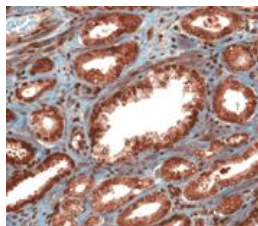**Gleason 6**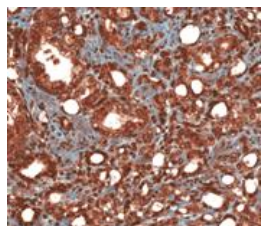**Gleason 7**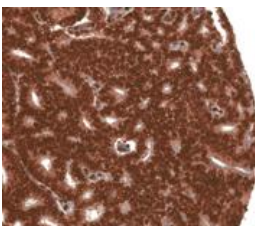**Gleason 8**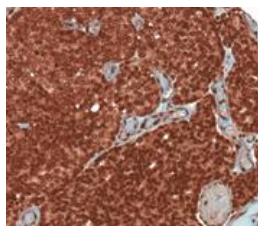**Androgen Ind****B**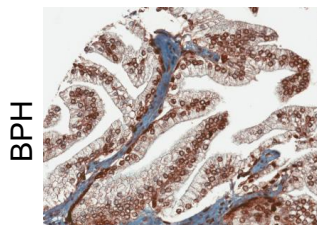**BPH**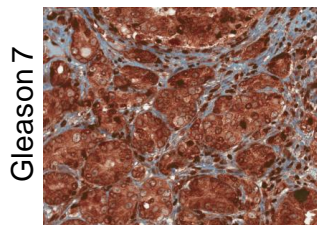**Gleason 7****C**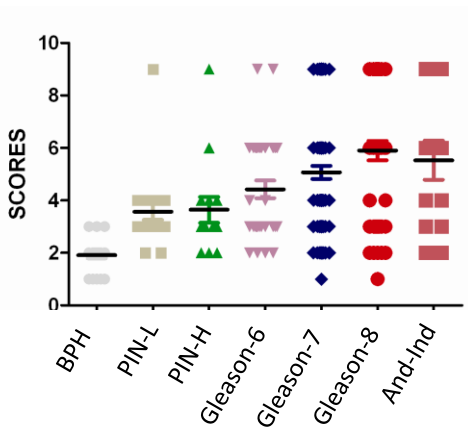

Supplement: MOESM8 [file 9551926]
